# Supplementary material for: Study methodology and insights from the palovarotene clinical development program in fibrodysplasia ossificans progressiva
Source: PubMed Central journal article supplement (PMC10642058; doi:10.1186/s12874-023-02080-7), 2023-11-13
Supplement: 12874_2023_2080_MOESM1_ESM.pdf [file 12874_2023_2080_MOESM1_ESM.pdf]

1 **Supplementary Figure 1. Study designs of the PVO-1A-001, PVO-1A-201 and PVO-1A-202 studies**

2

3

**Supplementary Figure 1A. PVO-1A-001 natural history study**

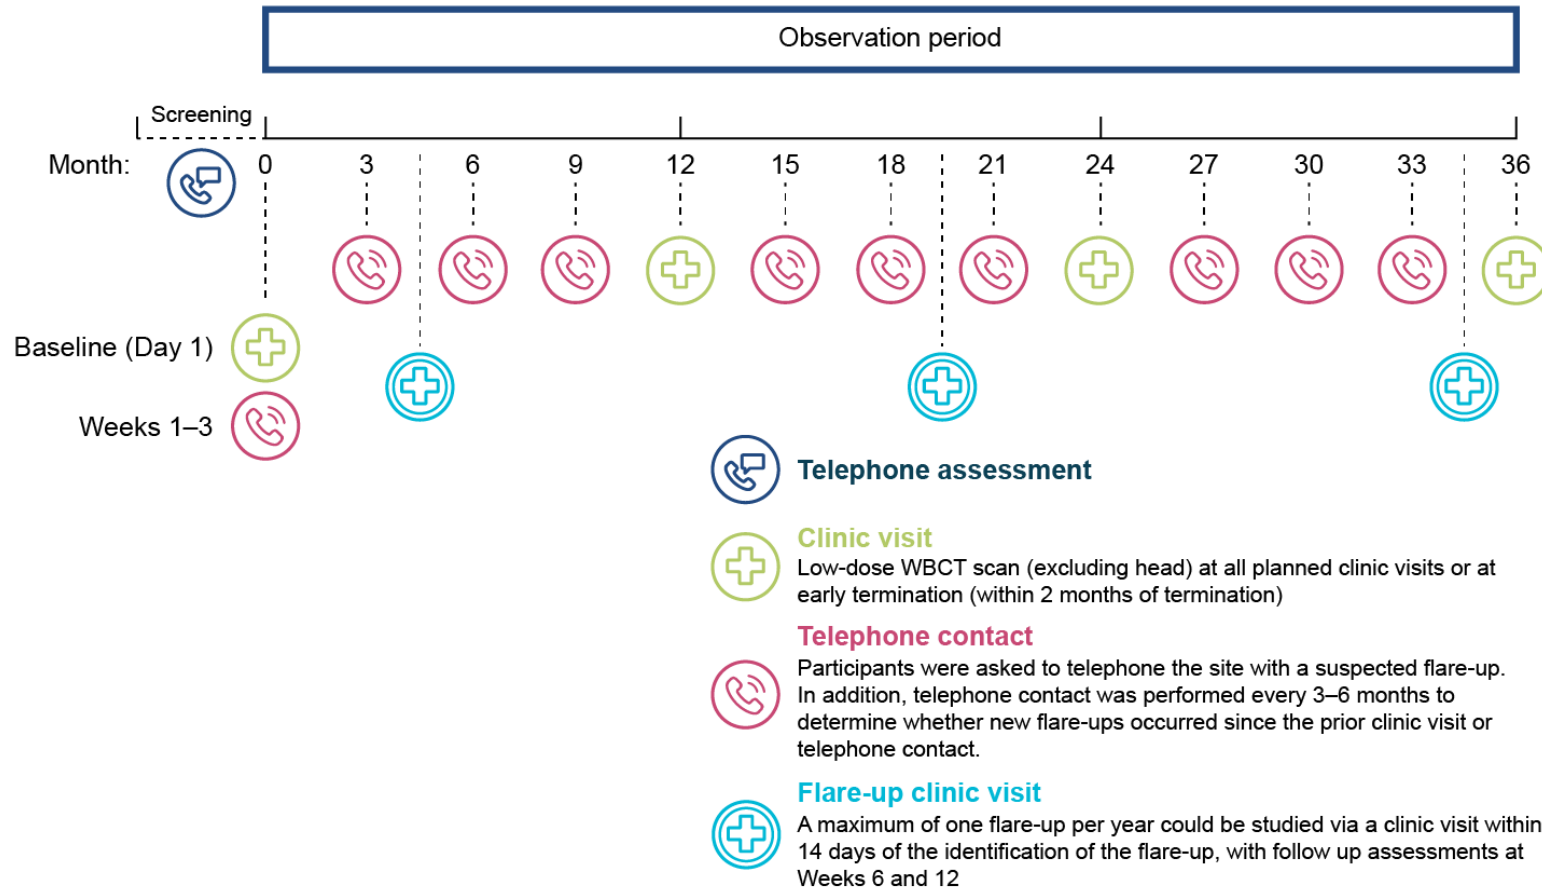

4  
5

WBCT: whole-body computed tomography.



1

### Supplementary Figure 1C. PVO-1A-202 open-label extension trial

#### Part A

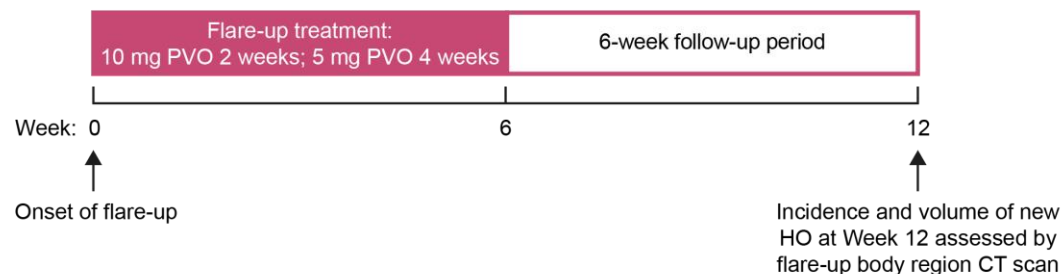

#### Part B

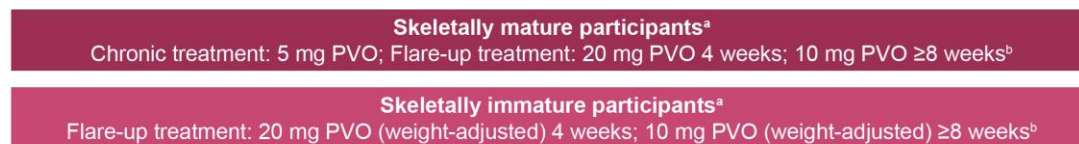

**Disease progression outcome:**  
Annualized change in new HO volume as assessed by WBCT

#### Part C

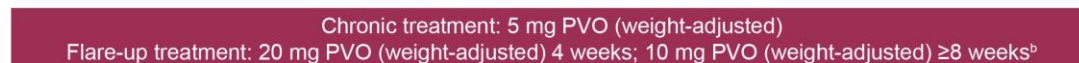

**Flare-up outcome:**  
Incidence and volume of new HO at Week 12 assessed by flare-up body region CT

Month: 0 12 24

2

3

4

5

6

In Part D of PVO-1A-202, annual assessments were obtained after the last dose of palovarotene in participants who were skeletally immature at the time of treatment discontinuation to obtain longer-term safety data. <sup>a</sup>Skeletally mature participants were  $\geq 18$  years of age or had  $\geq 90\%$  skeletal maturity on hand/wrist radiography [defined by a bone age of  $\geq 12$  years in female and  $\geq 14$  years in male participants] at screening. Skeletally immature participants were  $< 18$  years of age and had  $< 90\%$  skeletal maturity on hand/wrist radiography at screening. <sup>b</sup> $\geq 8$  weeks or until flare-up resolved. CT: computed tomography; HO: heterotopic ossification; PVO: palovarotene; WBCT: whole-body computed tomography.
